# Supplementary material for: A nickel nanoparticle engineered CoFe2O4/SiO2–NH2@carboxamide composite as a novel scaffold for the oxidation of sulfides and oxidative coupling of thiols
Source: Royal Society of Chemistry journal article supplement (doi:10.1039/d1ra01592c), 2021-01-01
Supplement: d1ra01592c1.pdf [file d1ra01592c1.pdf]

## Supplementary information

### A nickel nanoparticle engineered CoFe<sub>2</sub>O<sub>4</sub>/SiO<sub>2</sub>-NH<sub>2</sub>@Carboxamide composite as a novel scaffold for the oxidation of sulfides and oxidative coupling of thiols

MINA ZOHREVANDI, ROYA MOZAFARI and MOHAMMAD GHADERMAZI\*

Department of Chemistry, University of Kurdistan, P.O. Box 66135-416, Sanandaj, Iran

Fax: +98 873324133; Tel: 98 87 33624133

\* Email: mghadermazi@yahoo.com

### Spectra data of sulfides from Table 2.

#### Methyl phenyl sulfoxide (Table 2, entry 1)

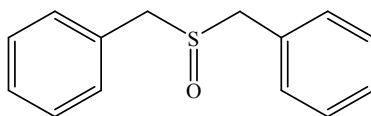

Melting point: 137-140°C. <sup>1</sup>HNMR (400 MHz, CDCl<sub>3</sub>, ppm): δ 4.16 (s, 4H), 7.38-7.30 (m, 10H); <sup>13</sup>CNMR (75 MHz, CDCl<sub>3</sub>, ppm): δ 58.03, 129.6, 129.16, 128.81, 128.51, 127.5. IR (KBr) (cm<sup>-1</sup>): ν (S=O): 1016–1072.

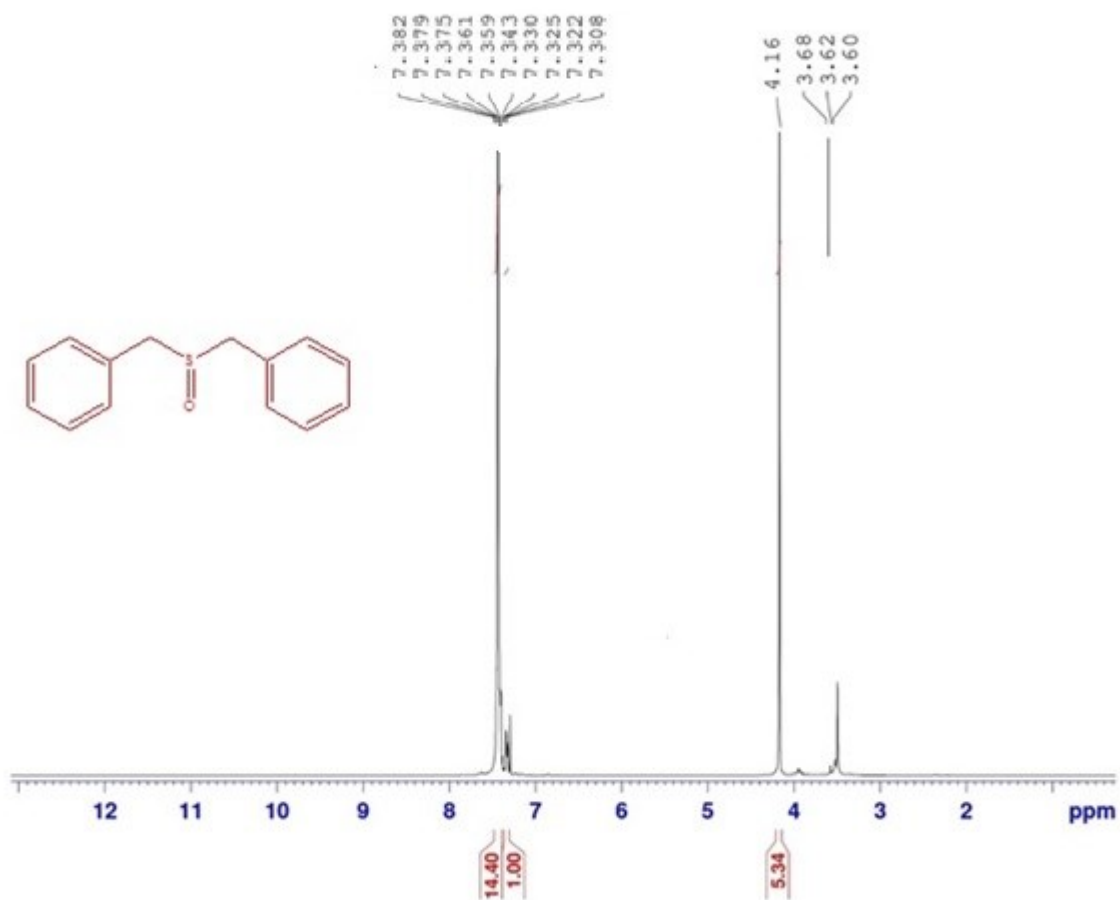

S1. <sup>1</sup>H NMR spectrum of methyl phenyl sulfoxide in CDCl<sub>3</sub> (Table 2, entry 1)

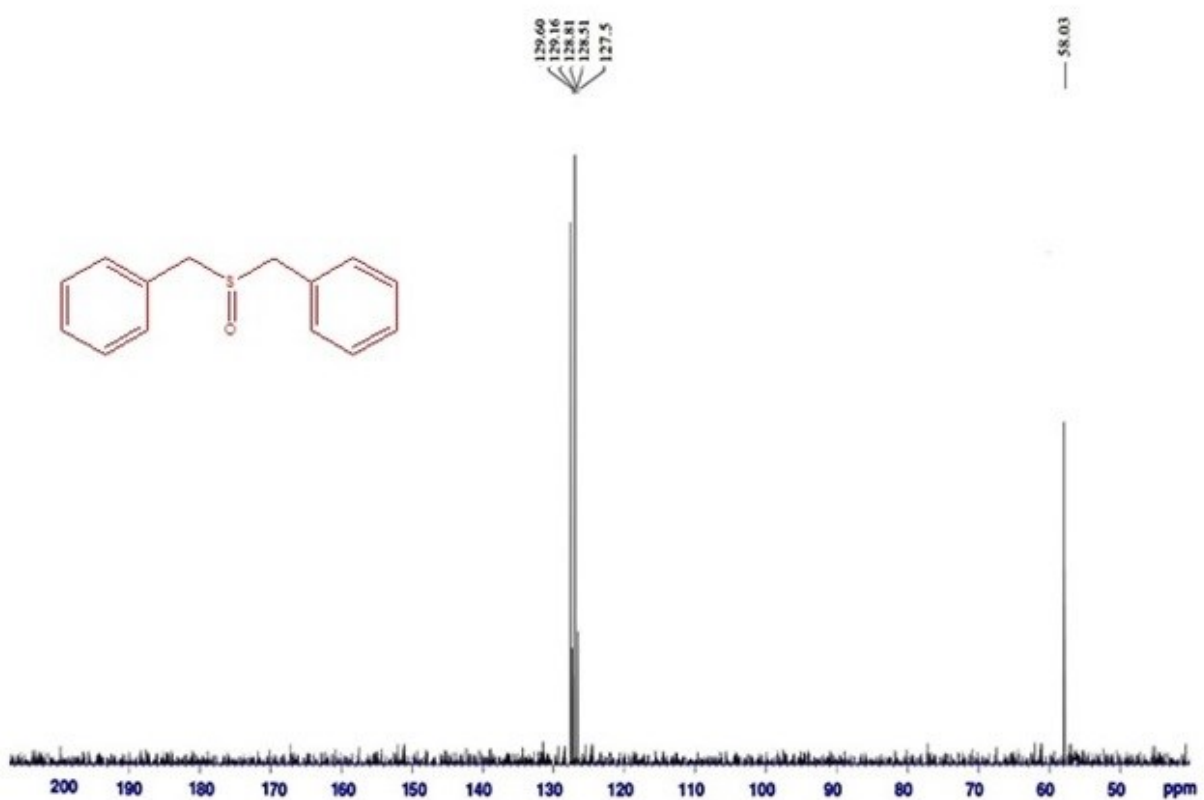

S2. <sup>13</sup>CNMR spectrum of methyl phenyl sulfoxide in CDCl<sub>3</sub> (Table 2, entry 1)

### Benzyl phenyl sulfoxide (Table 2, entry 2)

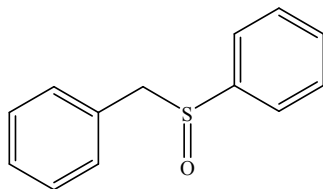

Melting point: 124-128 °C. <sup>1</sup>HNMR (400 MHz, CDCl<sub>3</sub>, ppm): δ 4.68 (s, 2H), 7.48-7.16 (m, 4H), 7.73-7.53 (m, 4H). <sup>13</sup>CNMR (75 MHz, CDCl<sub>3</sub>, ppm): δ 61.15, 138.83-134.29, 1131.45, 130.9, 131.1, 129.0. IR (KBr) (cm<sup>-1</sup>): ν (S=O): 1065.

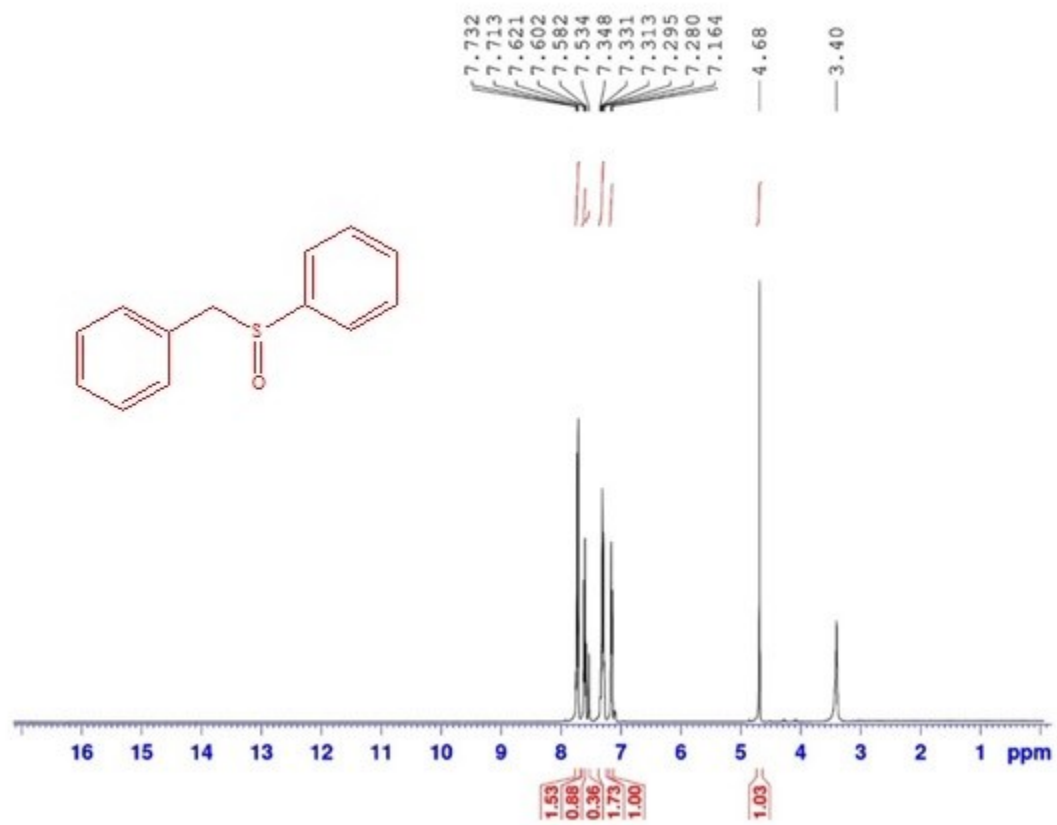

S3. <sup>1</sup>H N

MR spectrum of benzyl phenyl sulfoxide in CDCl<sub>3</sub> (Table 2, entry 2)

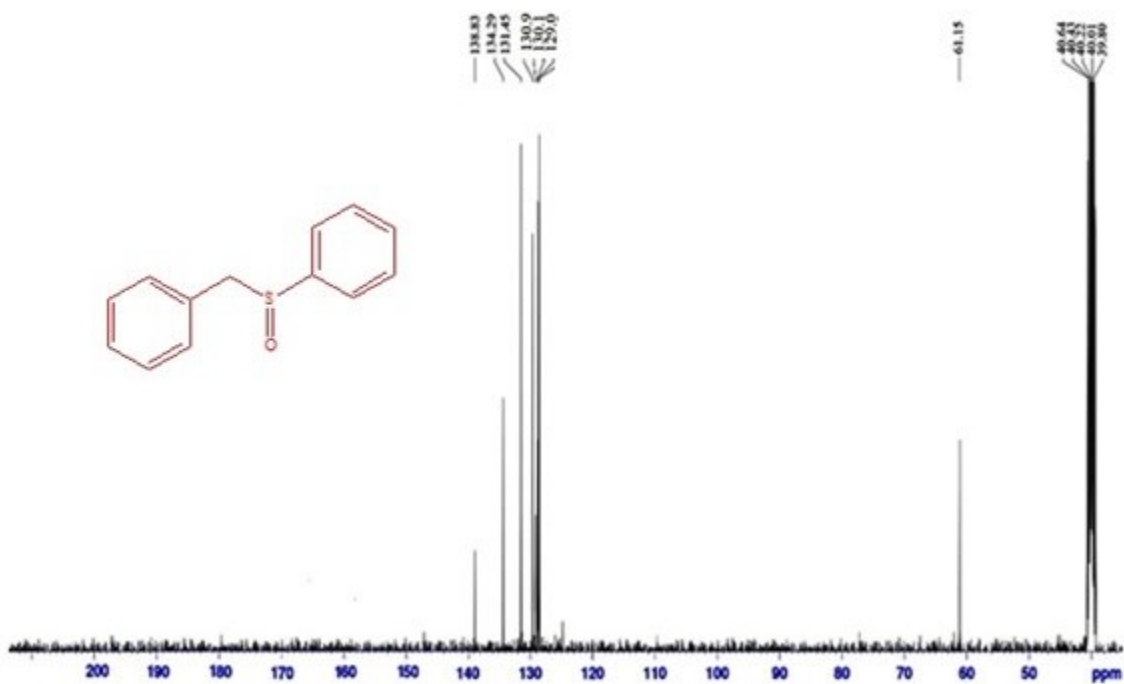

S4.  $^{13}\text{C}$ NMR spectrum of benzyl phenyl sulfoxide in  $\text{CDCl}_3$  (Table 2, entry 2)

### Methyl p-tolyl sulfoxide (Table 2, entry 4)

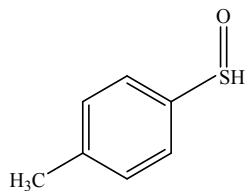

Melting point: 69-72.  $^1\text{H}$ NMR (300 MHz,  $\text{CDCl}_3$ , ppm):  $\delta$  3.60-3.68- (m, 3H), 7.29–7.45 (m, 5H);  $^{13}\text{C}$ NMR (75 MHz,  $\text{CDCl}_3$ , ppm):  $\delta$  35.15, 127.65, 128.69, 138.16. IR (KBr) ( $\text{cm}^{-1}$ ):  $\nu$  (S=O): 1082.

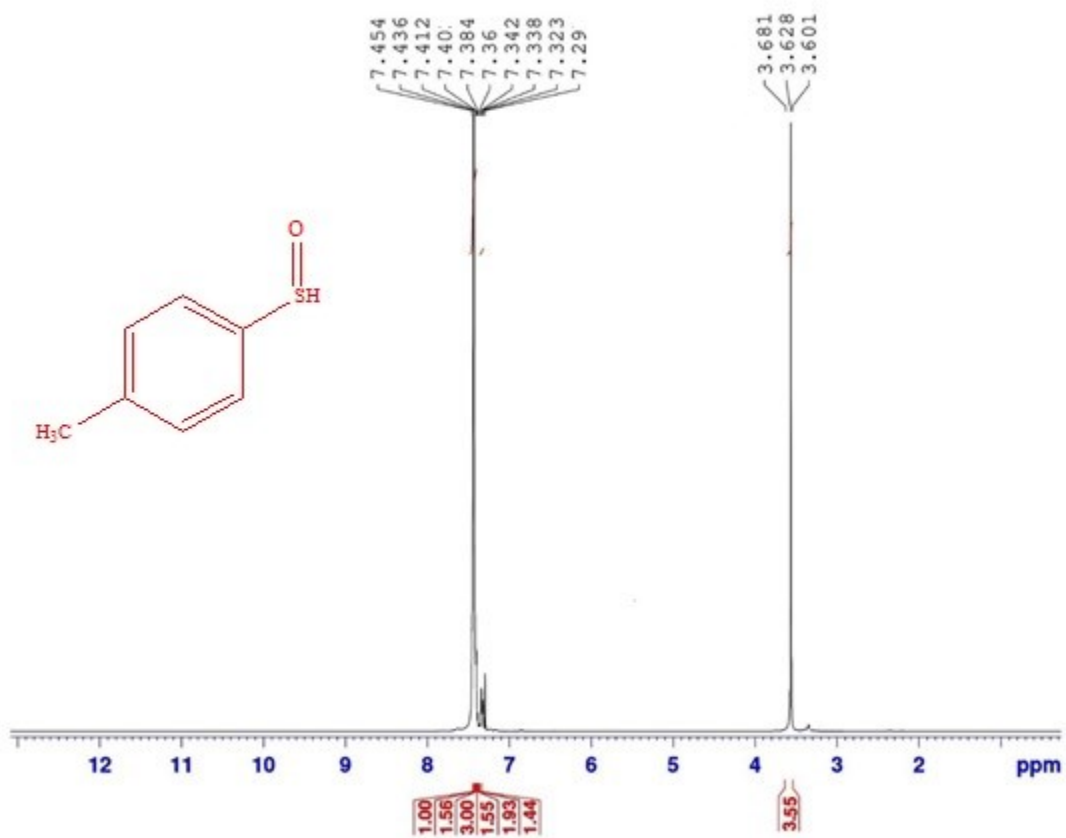

S5. <sup>1</sup>H NMR spectrum of Methyl p-tolyl sulfide in CDCl<sub>3</sub> (Table 2, entry 4)

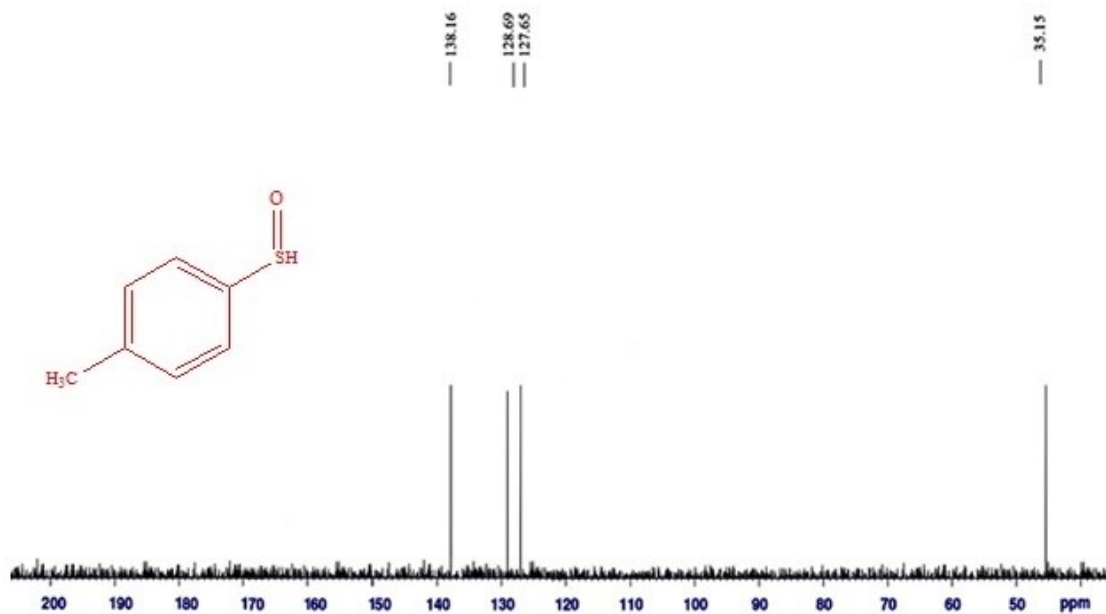

S6.  $^{13}\text{C}$ NMR spectrum of Methyl p-tolyl sulfonate in  $\text{CDCl}_3$  (Table 2, entry 4)

### 3, 3'-Sulfinyldipropionic acid (Table 2, entry 5)

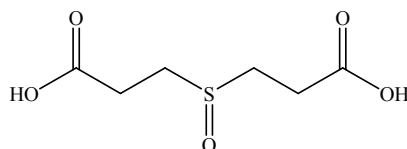

Melting point: 112-114 °C.  $^1\text{H}$ NMR (400 MHz,  $\text{CDCl}_3$ , ppm):  $\delta$  2.33-2.38 (s, 4H), 2.76– 2.82 (m, 4H), 7.70 (s, 2H);  $^{13}\text{C}$ NMR (75 MHz,  $\text{CDCl}_3$ , ppm):  $\delta$  53.03, 178.5. IR (KBr) ( $\text{cm}^{-1}$ ):  $\nu$  (S=O): 1109.

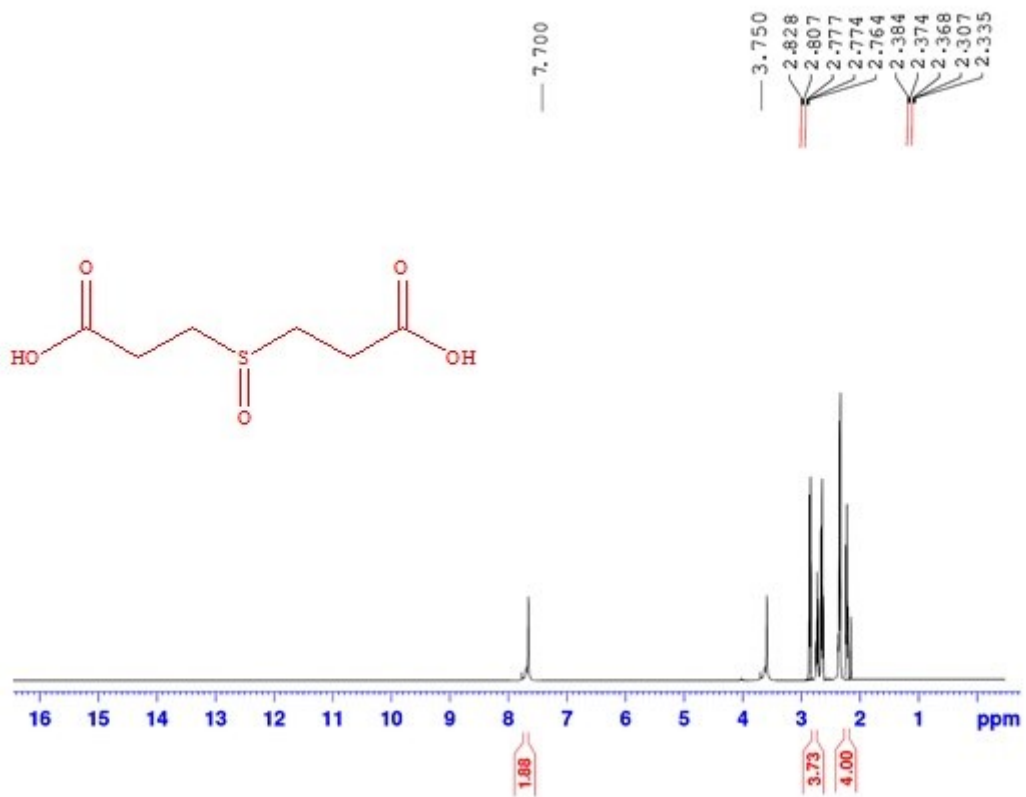

S7. <sup>1</sup>H NMR spectrum of 3, 3'-Sulfinyldipropionic acid in CDCl<sub>3</sub> (Table 2, entry 5)



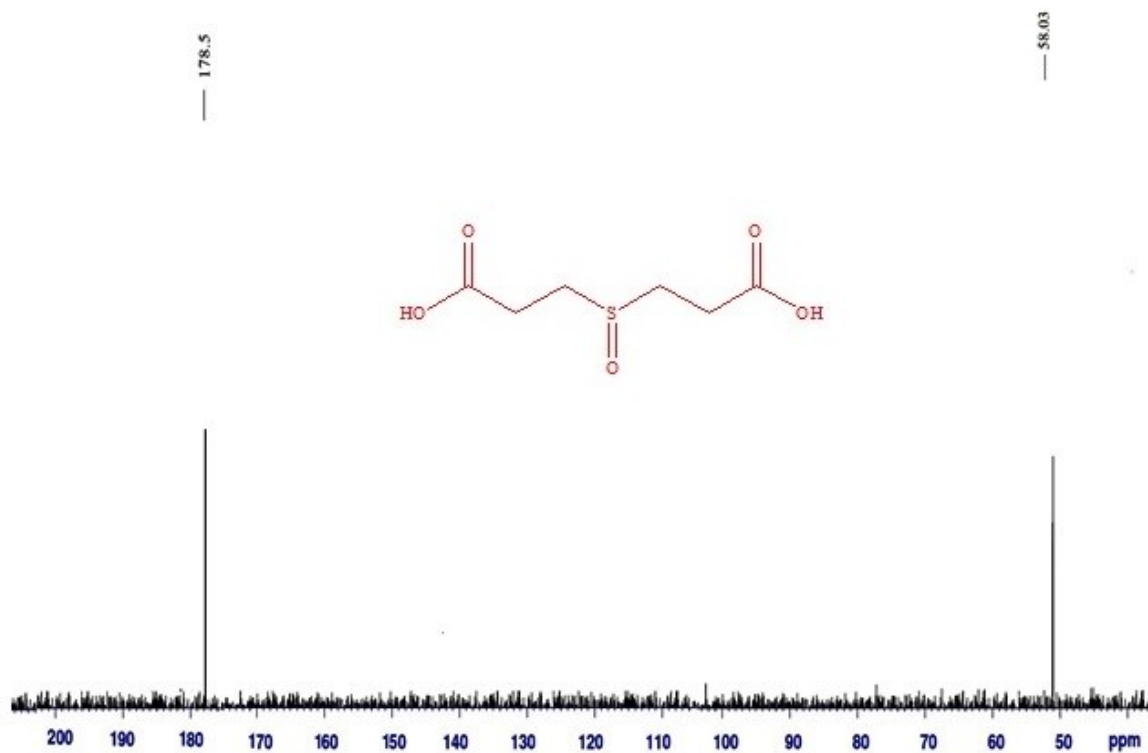

S8.  $^{13}\text{C}$ NMR spectrum of 3, 3'-Sulfinyldipropionic acid in  $\text{CDCl}_3$  (Table 2, entry 5)

### 1-bromo-4-(methylsulfinyl) benzene (Table 2, entry 12)

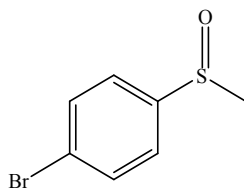

Melting point: 60-64.  $^1\text{H}$ NMR (400 MHz,  $\text{CDCl}_3$ , ppm):  $\delta$  2.43 (s, 3H), 7.29-7.37 (m, 4H).  $^{13}\text{C}$ NMR (75 MHz,  $\text{CDCl}_3$ , ppm):  $\delta$  44.19, 125.54, 129.4, 134.44, 144.49. IR (KBr) ( $\text{cm}^{-1}$ ):  $\nu$  ( $\text{S}=\text{O}$ ): 1028.

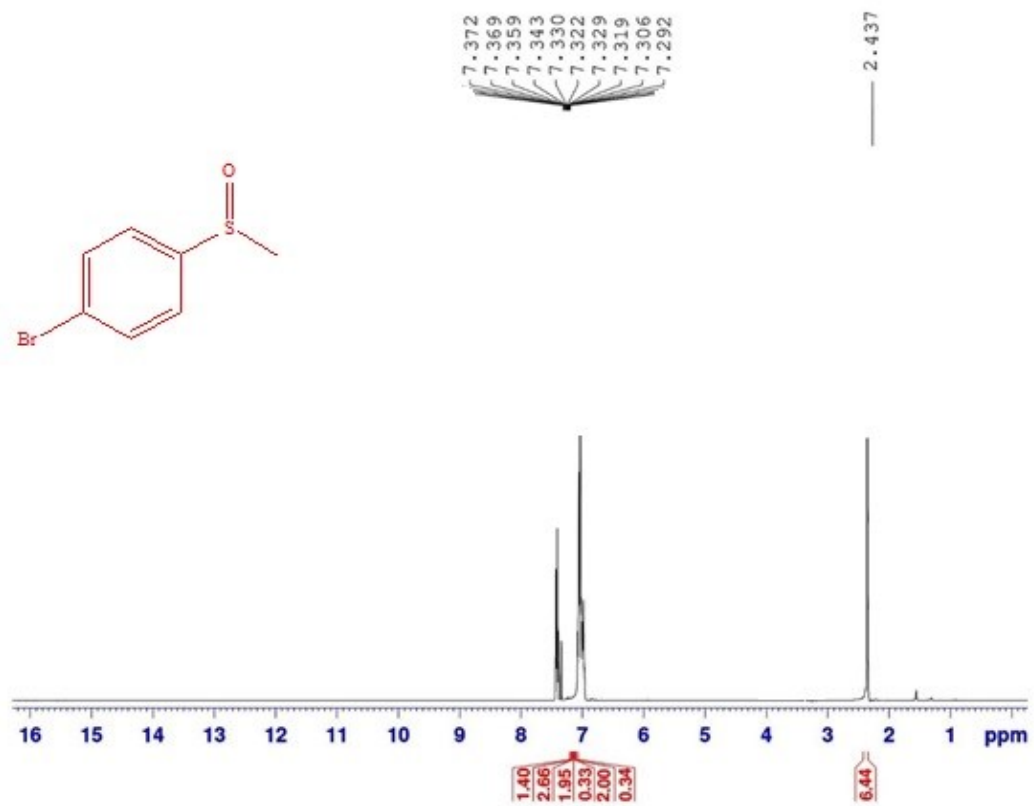

S9. <sup>1</sup>H NMR spectrum of 1-bromo-4-(methylsulfinyl) benzene in CDCl<sub>3</sub> (Table 2, entry 12)

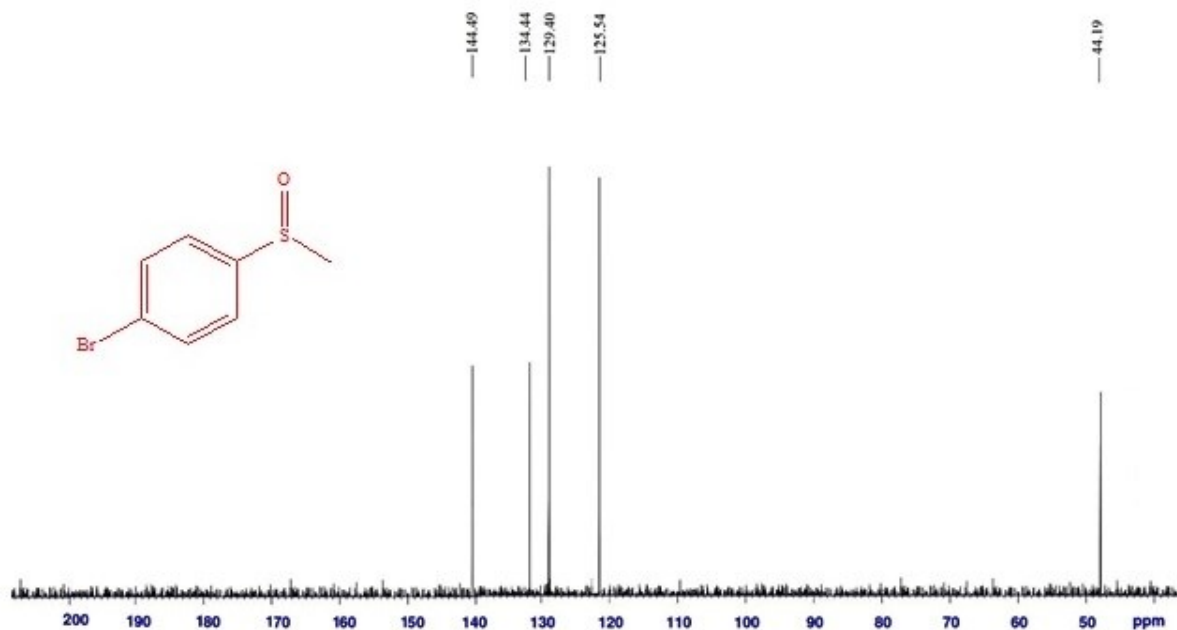

S10. <sup>13</sup>CNMR spectrum of 1-bromo-4-(methylsulfinyl) benzene in CDCl<sub>3</sub> (Table 2, entry 12)

## Spectra data of disulfides from Table 4.

### 1, 2-di(naphthalen-2-yl)disulfane (Table 4, entry 3)

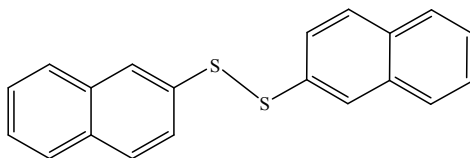

Melting point: 132-136°C. <sup>1</sup>HNMR (400 MHz, DMSO, ppm): δ 7.68-7.74 (m, 6H), 7.77-7.88 (m, 2H), 7.90– 7.95 (m, 6H); <sup>13</sup>CNMR (100 MHz, DMSO, ppm): δ 126.21-126.81, 126.86-126.90, 130.21-130.39, 130.60-130.93. IR (KBr) (cm<sup>-1</sup>): IR (KBr) (cm<sup>-1</sup>): ν (S-S): 1036.

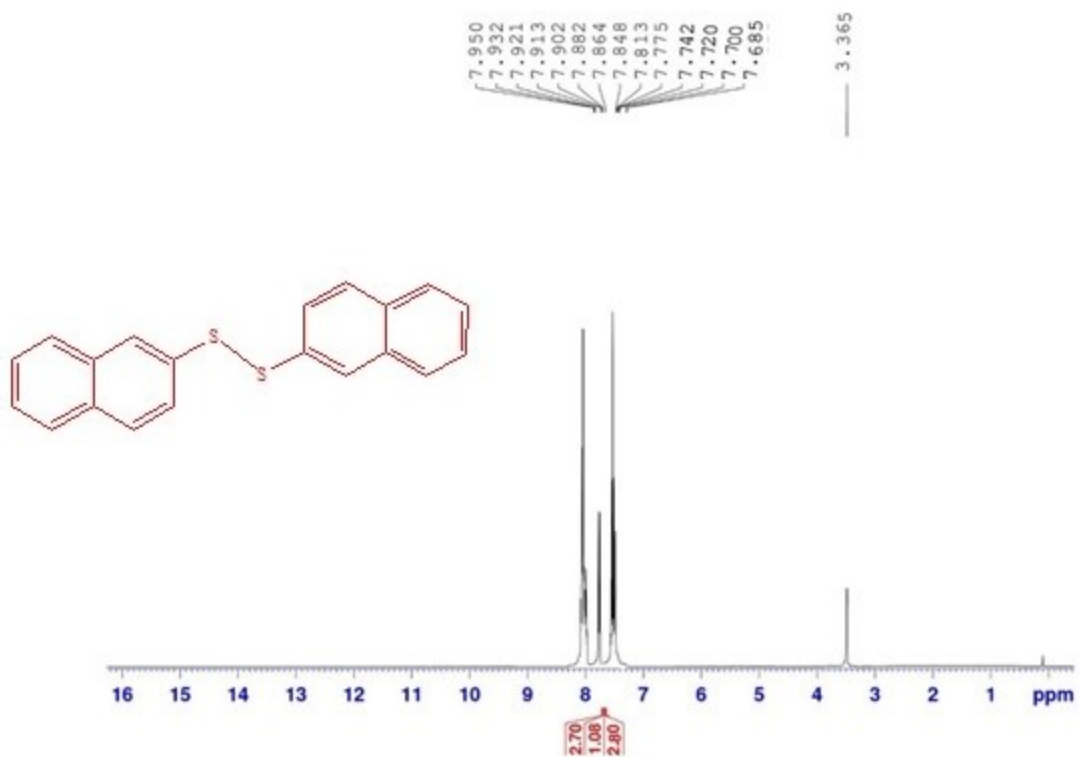

S11. <sup>1</sup>H-NMR spectrum of 1, 2-di(naphthalen-2-yl)disulfane in DMSO (Table 4, entry 3)

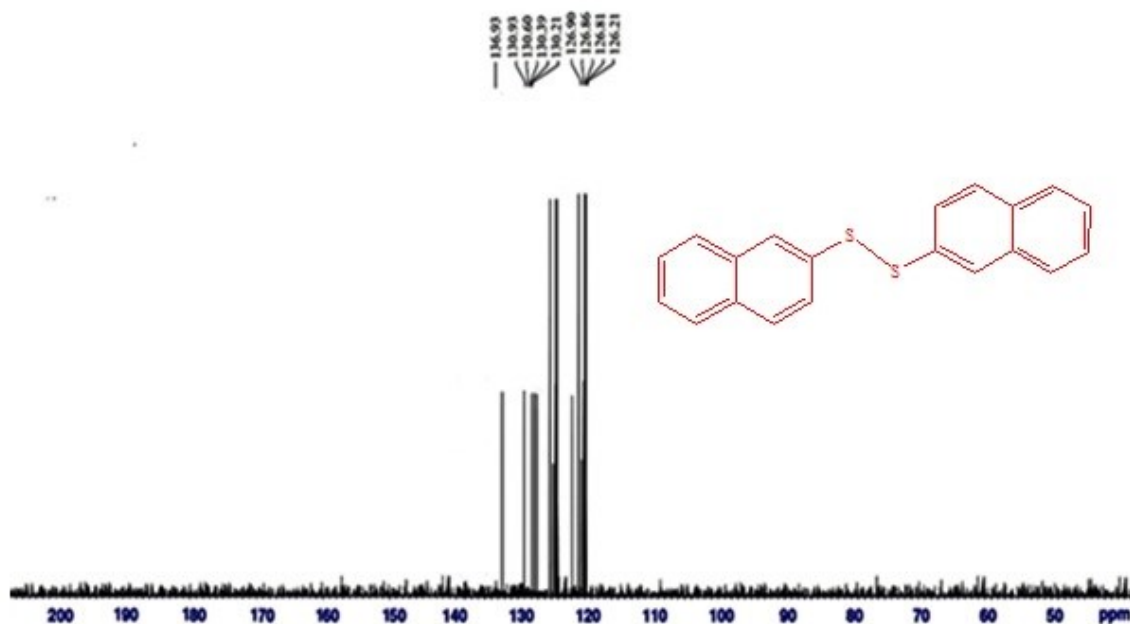

S12.  $^{13}\text{C}$ NMR spectrum of 1, 2-di(naphthalen-2-yl)disulfane in DMSO (Table 4, entry 3)

### 2, 2'- disulfanediyl dibenzoic acid (Table 4, entry 4)

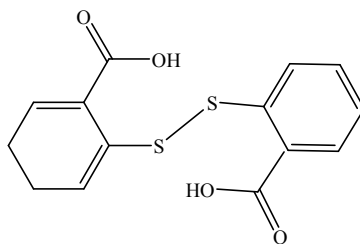

Melting point: 280-283 °C.  $^1\text{H}$ NMR (400 MHz, DMSO, ppm):  $\delta$  7.64-7.68 (m, 4H), 7.70-7.79 (m, 4H), 8.82- 8.44 (m, 2H);  $^{13}\text{C}$ NMR (100 MHz,  $\text{CDCl}_3$ , ppm):  $\delta$  125.50, 129.70, 134.45, 134.69, 169.83. IR (KBr) ( $\text{cm}^{-1}$ ):  $\nu$  (S-S): 1029.

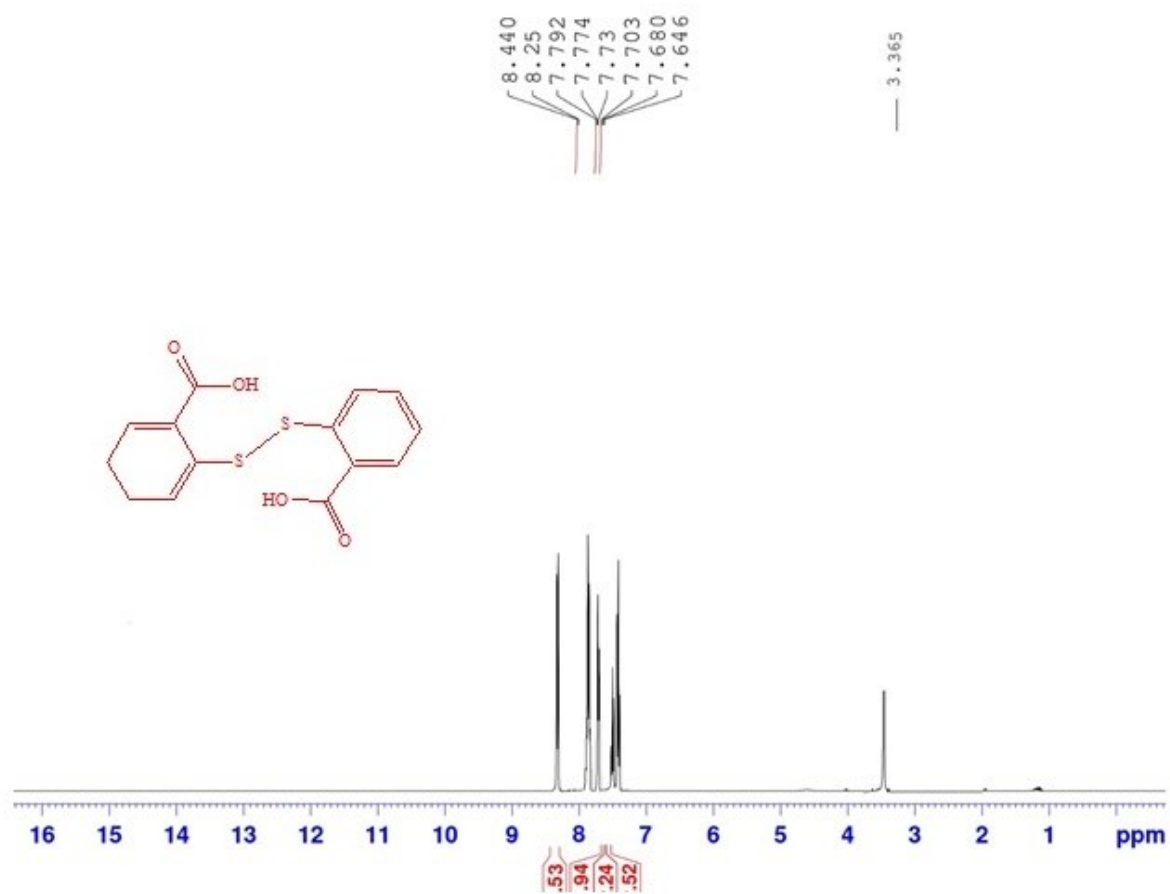

S13. <sup>1</sup>H-NMR spectrum of 2, 2'- disulfanediyldibenzoic acid in DMSO (Table 4, entry 4)

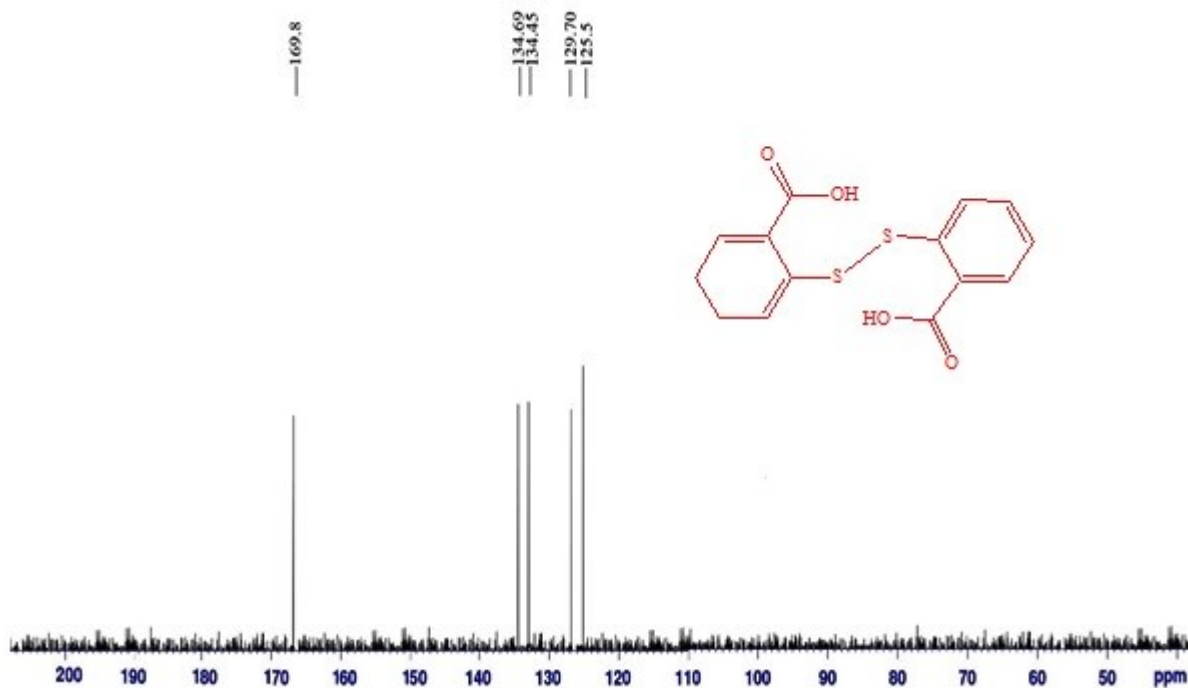

S14. <sup>13</sup>CNMR spectrum of 2, 2'- disulfanediyldibenzoic acid in DMSO (Table 4, entry 4)

### 2, 2'- disulfanediyldiethanol (Table 4, entry 6)

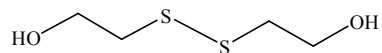

Melting point: Oil. <sup>1</sup>HNMR (400 MHz, DMSO, ppm): δ 2.262-2.798 (m, 4H), 3.38 (m, 4H); <sup>13</sup>CNMR (100 MHz, DMSO, ppm): δ 41.43, 61.61. IR (KBr) (cm<sup>-1</sup>): ν (S-S): 1047.

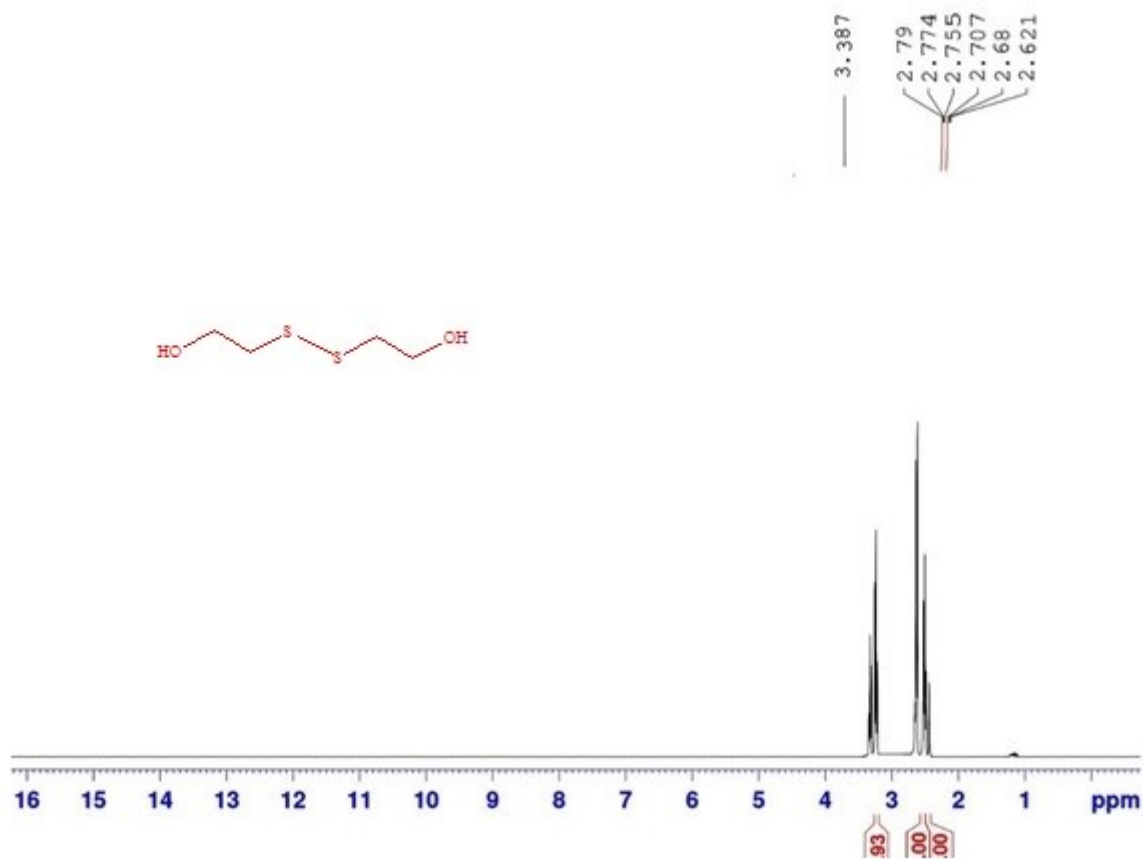

S15. <sup>1</sup>H-NMR spectrum of 2, 2'- disulfanediyldiethanol in DMSO (Table 4, entry 6)

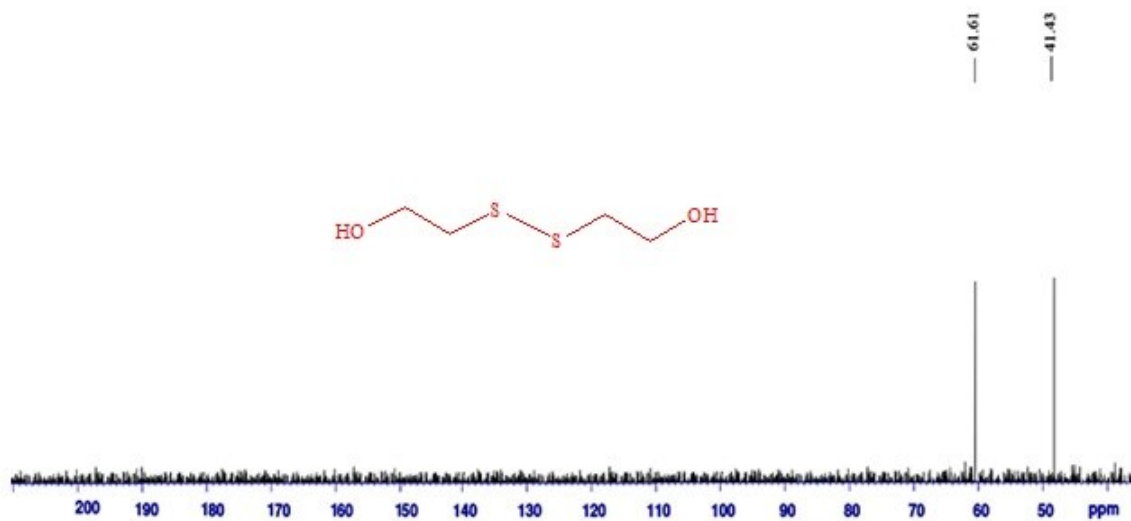



S16.  $^{13}\text{C}$ NMR spectrum of 2, 2'- disulfanediyl-diethanol in DMSO (Table 4, entry 6)

**1, 2-bis(benzo[d]oxazol-2-yl)disulfane (Table 2, entry 8)**

Melting point: 95-98 °C.  $^1\text{H}$ NMR (400 MHz,  $\text{CDCl}_3$ , ppm):  $\delta$  7.59-7.68 (m, 4H), 7.70– 7. 74 (m, 4H);  $^{13}\text{C}$ NMR (75 MHz,  $\text{CDCl}_3$ , ppm):  $\delta$  111.14, 118.41, 123.70 , 141.83, 151.44, 159.43. IR (KBr) ( $\text{cm}^{-1}$ ):  $\nu$  (S-S): 1042.

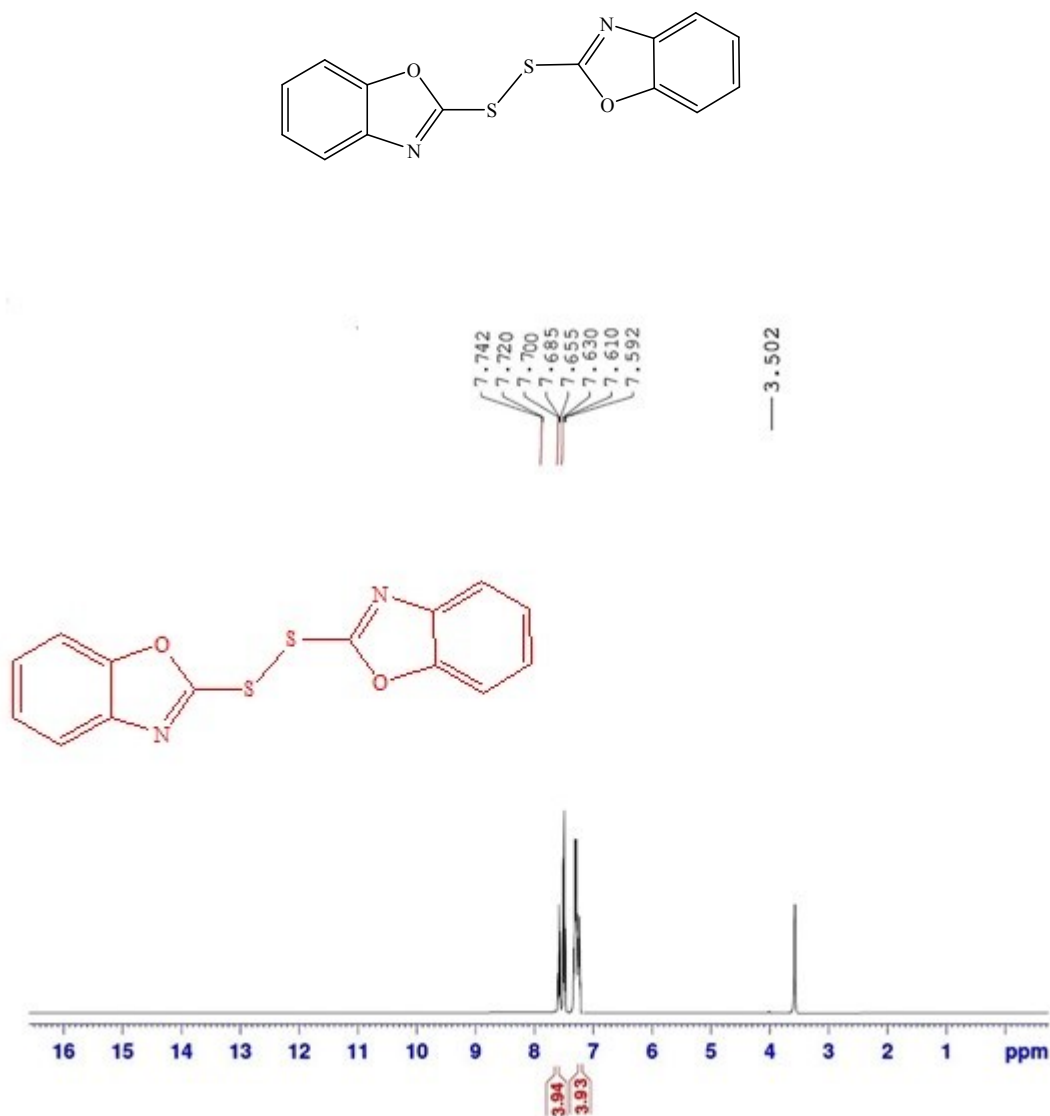

S17.  $^1\text{H}$ -NMR spectrum of 1, 2-bis(benzo[d]oxazol-2-yl)disulfane in  $\text{CDCl}_3$  (Table 2, entry 8)

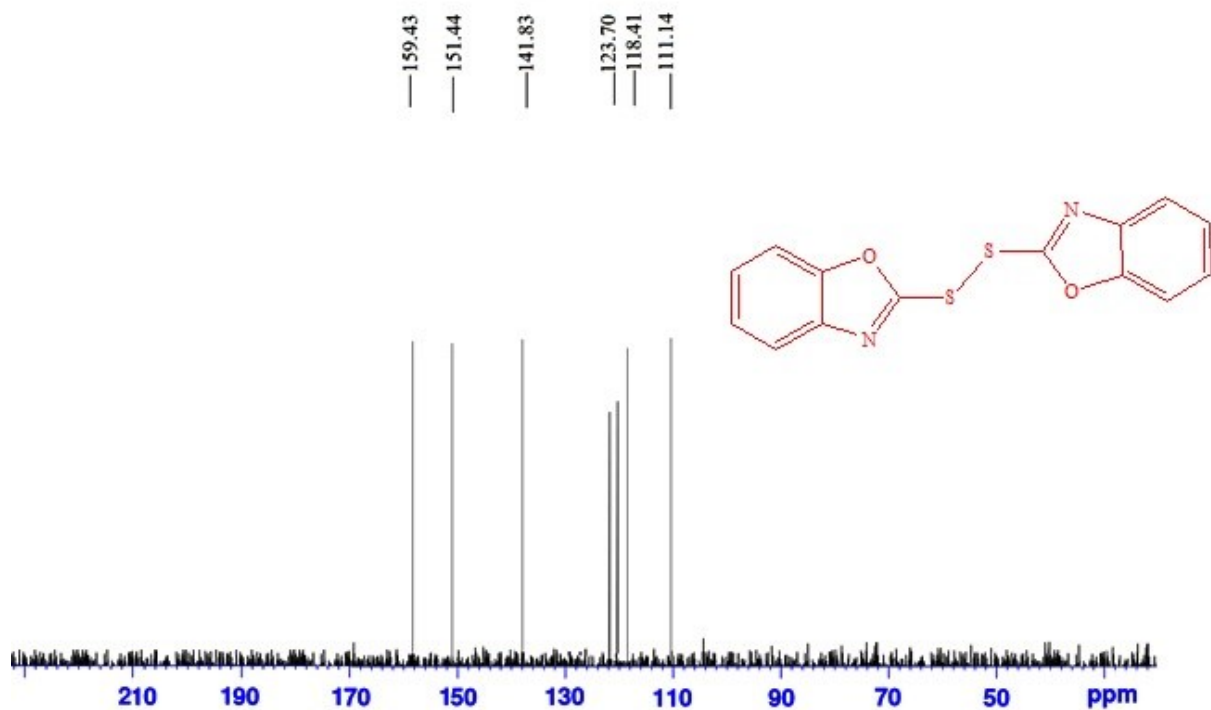

S18. <sup>13</sup>CNMR spectrum of 1, 2-bis(benzo[d]oxazol-2-yl)disulfane in CDCl<sub>3</sub> (Table 2, entry 8)

### 1, 2- diphenyldisulfane (Table 4, entry 9)

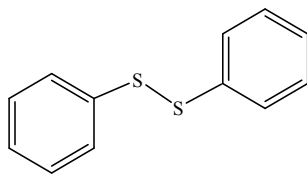

Melting point: 98-101 °C. <sup>1</sup>HNMR (300 MHz, CDCl<sub>3</sub>, ppm): δ 7.271-7.322 (m, 6H) ,7.325-7.382 (m, 4H); <sup>13</sup>CNMR (100 MHz, CDCl<sub>3</sub>, ppm): δ 125.51, 127.28, 129.56 , 136.83. IR (KBr) (cm<sup>-1</sup>): ν (S-S): 1043.

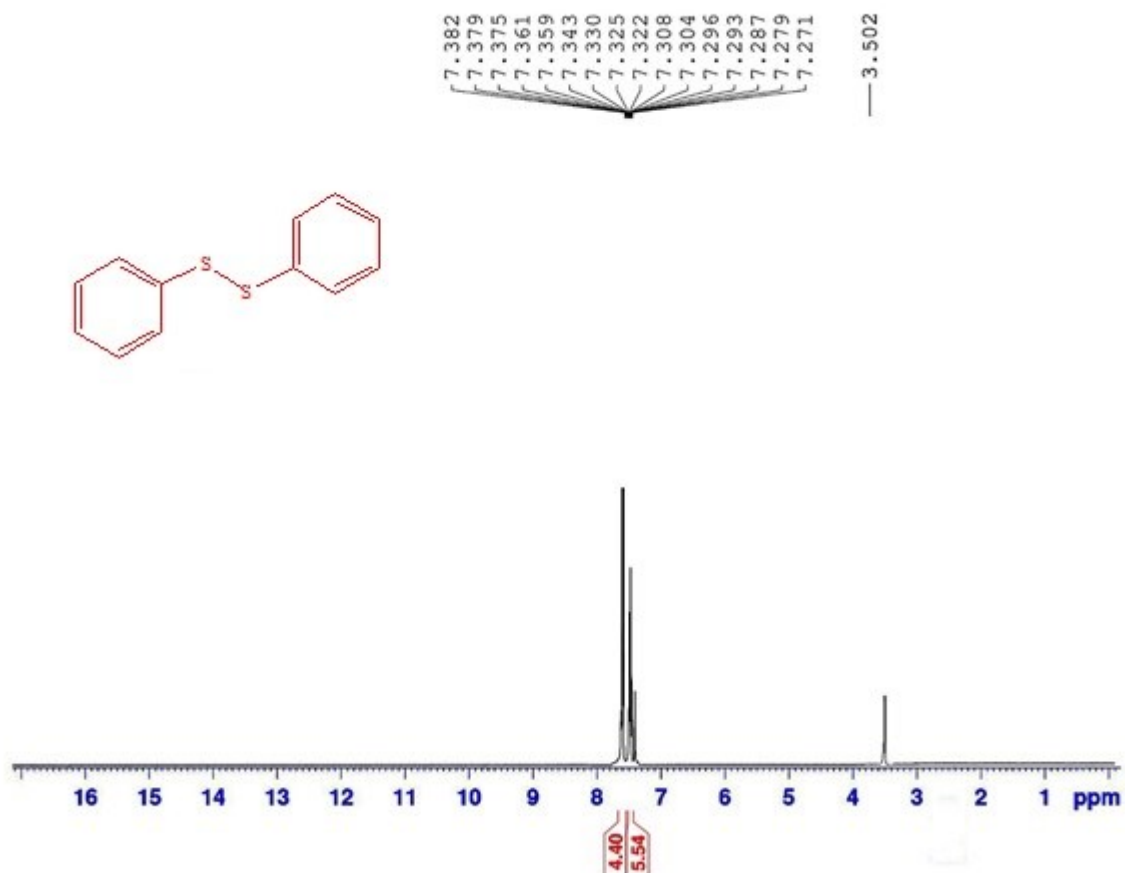

S19. <sup>1</sup>H-NMR spectrum of 1, 2- diphenyldisulfane in CDCl<sub>3</sub> (Table 4, entry 9)

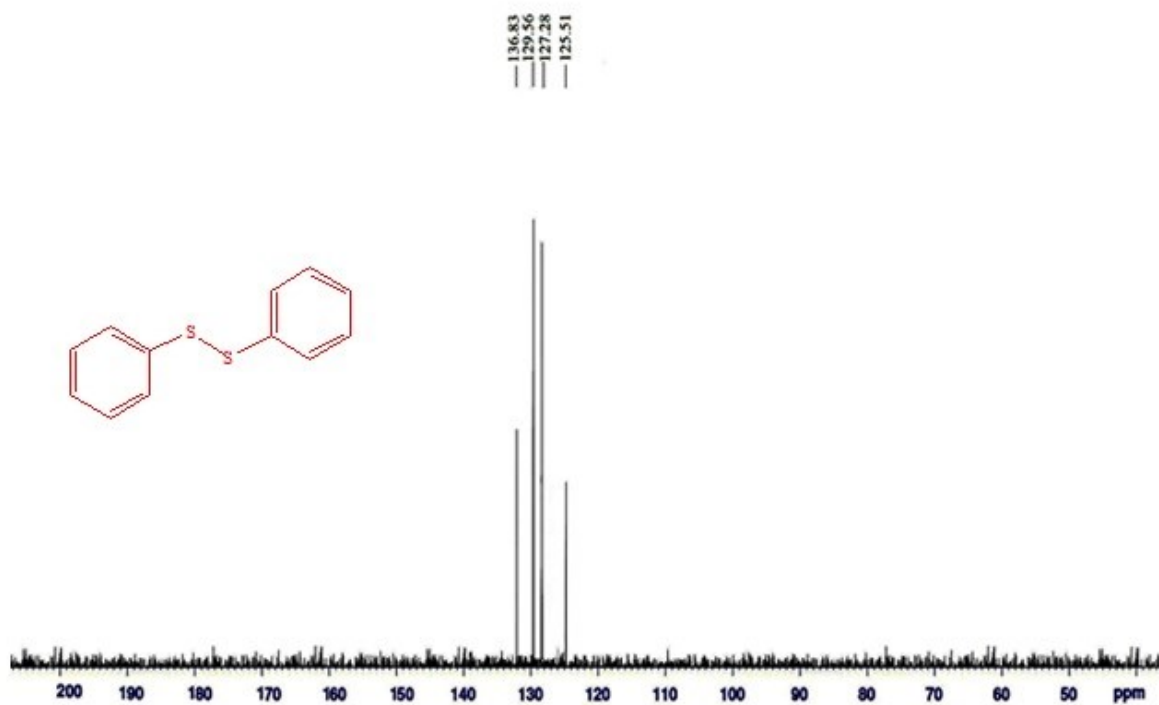

S20. <sup>13</sup>CNMR spectrum of 1, 2- dipenyldisulfane in CDCl<sub>3</sub> (Table 4, entry 9)
